# Supplementary material for: Basal Diet Determined Long-Term Composition of the Gut Microbiome and Mouse Phenotype to a Greater Extent than Fecal Microbiome Transfer from Lean or Obese Human Donors
Source: PubMed Central journal article supplement (PMC6682898; doi:10.3390/nu11071630), 2019-07-17
Supplement: nutrients-11-01630-s001.pdf [file nutrients-11-01630-s001.pdf]

# Basal diet determined long-term composition of the gut microbiome and mouse phenotype to a greater extent than fecal microbiome transfer from lean or obese human donors

Daphne M. Rodriguez<sup>1</sup>, Abby D. Benninghoff<sup>1,3\*</sup>, Niklas D.J. Aardema<sup>2</sup>, Sumira Phatak<sup>1</sup>, and Korrry J. Hintze<sup>2,3\*</sup>

1. Department of Animal, Dairy and Veterinary Sciences, Utah State University, Logan, UT 84322, USA

2. Department of Nutrition, Dietetics and Food Sciences, Utah State University, Logan, UT 84322, USA

3. USTAR Applied Nutrition Research, Utah State University, Logan, UT 84322, USA

\* **Corresponding author:** Abby D. Benninghoff, Utah State University, Department of Animal, Dairy and Veterinary Sciences, 4815 Old Main Hill, Logan, UT 84322-4815, USA, Phone: 435-797-8649, Email: [abby.benninghoff@usu.edu](mailto:abby.benninghoff@usu.edu), Korrry J. Hintze, Utah State University, Department of Nutrition, Dietetics and Food Sciences, 8700 Old Main Hill, Logan, UT 84322-8700, USA, Phone: 435-797-2124, Email: [korry.hintze@usu.edu](mailto:korry.hintze@usu.edu)

## SUPPLEMENTAL MATERIALS

**Table S1** Parameters of donors

| Donor | Age | BMI  | Waist circumference (cm) | Ethnicity | Sex  |
|-------|-----|------|--------------------------|-----------|------|
| Lean  |     |      |                          |           |      |
| L1    | 65  | 22.5 | 89.2                     | White     | Male |
| L2    | 32  | 20.1 | 82.7                     | White     | Male |
| L3    | 29  | 22.6 | 75.0                     | Asian     | Male |
| Obese |     |      |                          |           |      |
| O4    | 28  | 34.8 | 113.7                    | White     | Male |
| O5    | 28  | 30.6 | 101.5                    | White     | Male |
| O6    | 65  | 31.0 | 109.5                    | White     | Male |

Abbreviations: *BMI* body mass index

**Table S2** Composition of experimental diets

| Nutrient                     | AIN93G       | DIO          | TWD          |
|------------------------------|--------------|--------------|--------------|
| Energy density (kcal/g)      | 3.8          | 4.6          | 4.4          |
| Macronutrient                |              |              |              |
| Carbohydrates (g/kg diet)    |              |              |              |
| Corn starch                  | 398          | 85           | 230          |
| Maltodextrin                 | 132          | 115          | 70           |
| Sucrose                      | 100          | 200          | 261          |
| Cellulose                    | 50           | 58           | 30           |
| <i>kcal (% of total)</i>     | <i>60.1%</i> | <i>36.2%</i> | <i>54.5%</i> |
| Proteins (g/kg)              |              |              |              |
| Casein                       | 200          | 245          | 190          |
| L-cystine                    | 3            | 3.5          | 2.8          |
| <i>kcal (% of total)</i>     | <i>18.8%</i> | <i>19.0%</i> | <i>15.4%</i> |
| Fats (g/kg)                  |              |              |              |
| Soybean oil                  | 70           | 30           | 31.4         |
| Anhydrous milk fat           |              |              | 36.3         |
| Olive oil                    |              |              | 28.0         |
| Lard                         |              | 195          | 28.0         |
| Beef tallow                  |              |              | 24.8         |
| Corn oil                     |              |              | 16.5         |
| Cholesterol                  |              |              | 0.4          |
| <i>kcal (% of total)</i>     | <i>17.2%</i> | <i>44.8%</i> | <i>34.5%</i> |
| Micronutrients               |              |              |              |
| Minerals (mg/kg)             |              |              |              |
| Calcium                      | 5000         | 5000         | 2011         |
| Phosphorus                   | 3000         | 3000         | 2757         |
| Sodium                       | 1019         | 1019         | 7078         |
| Potassium                    | 3600         | 3600         | 5333         |
| Magnesium                    | 507          | 507          | 589          |
| Iron                         | 35           | 35           | 31           |
| Zinc                         | 30           | 30           | 25           |
| Copper                       | 6            | 6            | 2.6          |
| Selenium                     | 0.15         | 0.15         | 0.2          |
| Vitamins (unit/kg)           |              |              |              |
| Thiamin (mg)                 | 5            | 5            | 3.5          |
| Riboflavin (mg)              | 6            | 6            | 4.4          |
| Niacin (mg)                  | 30           | 30           | 50.6         |
| Pyridoxine (mg)              | 6            | 6            | 3.9          |
| Folate (mg)                  | 2            | 2            | 1.3          |
| Vitamin B <sub>12</sub> (µg) | 25           | 25           | 11           |
| Vitamin A (IU)               | 4000         | 4000         | 4300         |
| Vitamin D (IU)               | 1000         | 1000         | 391          |
| Vitamin E (IU)               | 75           | 75           | 24.6         |
| Vitamin K (µg)               | 750          | 750          | 189          |
| Choline (mg)                 | 1027         | 1027         | 648          |

*Abbreviations:* AIN American Institution of Nutrition, DIO diet-induced obesity, TWD total Western diet.

*Notes:* Composition of the TWD was published previously [66] No data are available in NHANES for chloride, manganese, iodine, pantothenic acid, biotin, or ultra-trace minerals. Thus, levels of these components in the AIN93G diet were used in the formulation of all experimental diets.

**Table S3** Primer sequences and barcodes for microbiome sequencing <sup>1</sup>

| Barcode  | Primer sequence (5'-3') | MIDD |
|----------|-------------------------|------|
| AACCAACC | CCTACGGGRSGCAGCAG       | 1    |
| AACCAAGG | CCTACGGGRSGCAGCAG       | 2    |
| AACCATCG | CCTACGGGRSGCAGCAG       | 3    |
| AACCATGC | CCTACGGGRSGCAGCAG       | 4    |
| AACCGCAT | CCTACGGGRSGCAGCAG       | 5    |
| AACCGCTA | CCTACGGGRSGCAGCAG       | 6    |
| AACCGGAA | CCTACGGGRSGCAGCAG       | 7    |
| AACCGGTT | CCTACGGGRSGCAGCAG       | 8    |
| AACCTACG | CCTACGGGRSGCAGCAG       | 9    |
| AACCTAGC | CCTACGGGRSGCAGCAG       | 10   |
| AACCTTCC | CCTACGGGRSGCAGCAG       | 11   |
| AACCTTGG | CCTACGGGRSGCAGCAG       | 12   |
| AACGAACG | CCTACGGGRSGCAGCAG       | 13   |
| AACGAAGC | CCTACGGGRSGCAGCAG       | 14   |
| AACGATCC | CCTACGGGRSGCAGCAG       | 15   |
| AACGATGG | CCTACGGGRSGCAGCAG       | 16   |
| AACGCCAT | CCTACGGGRSGCAGCAG       | 17   |
| AACGCCTA | CCTACGGGRSGCAGCAG       | 18   |
| AACGCGAA | CCTACGGGRSGCAGCAG       | 19   |
| AACGCGTT | CCTACGGGRSGCAGCAG       | 20   |
| AACGGCAA | CCTACGGGRSGCAGCAG       | 21   |
| AACGGCTT | CCTACGGGRSGCAGCAG       | 22   |
| AACGTACC | CCTACGGGRSGCAGCAG       | 23   |
| AACGTAGG | CCTACGGGRSGCAGCAG       | 24   |
| AACGTTCG | CCTACGGGRSGCAGCAG       | 25   |
| AACGTTGC | CCTACGGGRSGCAGCAG       | 26   |
| AAGCAACG | CCTACGGGRSGCAGCAG       | 27   |
| AAGCAAGC | CCTACGGGRSGCAGCAG       | 28   |
| AAGCATCC | CCTACGGGRSGCAGCAG       | 29   |
| AAGCATGG | CCTACGGGRSGCAGCAG       | 30   |
| AAGCCGAA | CCTACGGGRSGCAGCAG       | 31   |
| AAGCCGTT | CCTACGGGRSGCAGCAG       | 32   |
| AAGCGCAA | CCTACGGGRSGCAGCAG       | 33   |
| AAGCGCTT | CCTACGGGRSGCAGCAG       | 34   |
| AAGCGGAT | CCTACGGGRSGCAGCAG       | 35   |
| AAGCGGTA | CCTACGGGRSGCAGCAG       | 36   |
| AAGCTACC | CCTACGGGRSGCAGCAG       | 37   |
| AAGCTAGG | CCTACGGGRSGCAGCAG       | 38   |
| AAGCTTCG | CCTACGGGRSGCAGCAG       | 39   |
| AAGCTTGC | CCTACGGGRSGCAGCAG       | 40   |
| AAGGAACC | CCTACGGGRSGCAGCAG       | 41   |
| AAGGAAGG | CCTACGGGRSGCAGCAG       | 42   |
| AAGGATCG | CCTACGGGRSGCAGCAG       | 43   |
| AAGGATGC | CCTACGGGRSGCAGCAG       | 44   |
| AAGGCCAA | CCTACGGGRSGCAGCAG       | 45   |
| AAGGCCTT | CCTACGGGRSGCAGCAG       | 46   |
| AAGGCGAT | CCTACGGGRSGCAGCAG       | 47   |
| AAGGCGTA | CCTACGGGRSGCAGCAG       | 48   |
| AAGGTACG | CCTACGGGRSGCAGCAG       | 49   |
| AAGGTAGC | CCTACGGGRSGCAGCAG       | 50   |
| AAGGTTCC | CCTACGGGRSGCAGCAG       | 51   |
| AAGGTTGG | CCTACGGGRSGCAGCAG       | 52   |
| AATACCGC | CCTACGGGRSGCAGCAG       | 53   |

**Table S3** Primer sequences and barcodes for microbiome sequencing <sup>1</sup>

| Barcode  | Primer sequence (5'-3') | MIDD |
|----------|-------------------------|------|
| AATACGCC | CCTACGGGRSGCAGCAG       | 54   |
| AATAGCGG | CCTACGGGRSGCAGCAG       | 55   |
| AATAGGCG | CCTACGGGRSGCAGCAG       | 56   |
| AATTCCGG | CCTACGGGRSGCAGCAG       | 57   |
| AATTCGCG | CCTACGGGRSGCAGCAG       | 58   |
| AATTCGGC | CCTACGGGRSGCAGCAG       | 59   |
| AATTGCCG | CCTACGGGRSGCAGCAG       | 60   |

<sup>1</sup> Ion Torrent Primer A-Key CCATCTCATCCCTGCGTGTCTCCGAC; Ion Torrent Primer P-1 Key CCTCTCTATGGGCAGTCGGTGAT; key sequence TCAG; linker GAT; reverse primer sequence was ATTACCG.

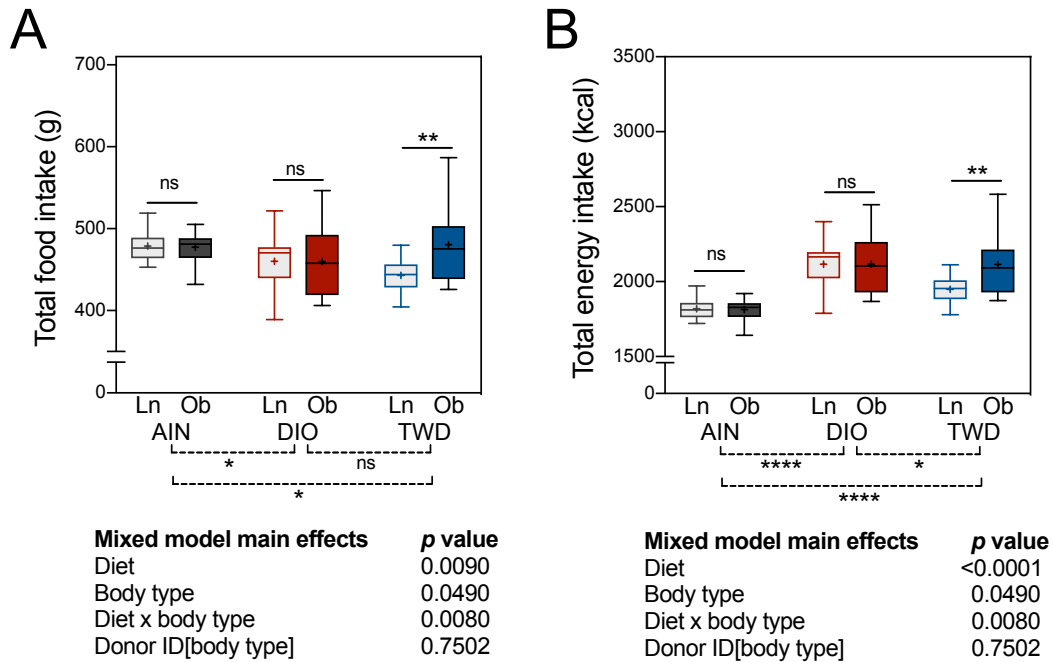

**Fig. S1** Food and energy intake. Data are presented in Tukey box-plots (box, 25<sup>th</sup> to 75<sup>th</sup> percentiles; whiskers, 1.5 IQR; +, mean) ( $n = 6$  to  $9$ ) for total food intake (A) and total energy intake (B). The table beneath each panel shows  $p$  values for main effects of each experimental factor as determined by the mixed model analysis. Below the plot, brackets indicate results of Tukey post-hoc tests for overall effects of each diet. Within each diet group, symbols above the box-and-whisker bars indicate results of post-hoc tests comparing mice that received bacteria from lean (Ln) or obese (Ob) human donors. \*  $p < 0.05$ , \*\*  $p < 0.01$ , \*\*\*  $p < 0.001$ , \*\*\*\*  $p < 0.0001$ , ns=not significant.

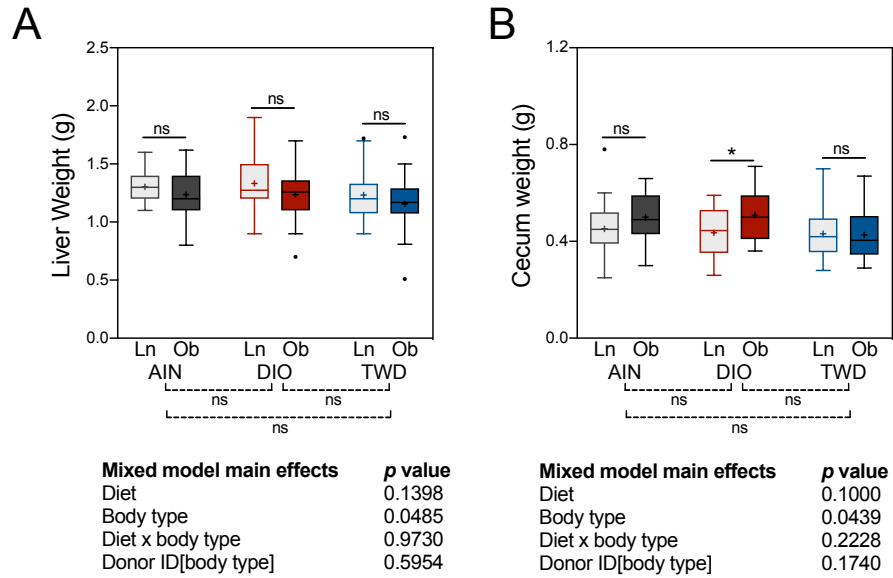

**Fig. S2** Liver and cecum weights. Data for liver weight (A) and cecum weight (B) are shown in Tukey box-plots (box, 25<sup>th</sup> to 75<sup>th</sup> percentiles; whiskers, 1.5 IQR; +, mean) ( $n = 6$  to  $9$ ). The tables below each panel show  $p$  values for main effects of each experimental factor as determined by the mixed model analysis. Below each plot, brackets indicate results of Tukey post-hoc tests for overall effects of each diet. Within each diet group, symbols above the box-and-whisker bars indicate results of post-hoc tests comparing mice that received bacteria from lean (Ln) or obese (Ob) human donors. \*  $p < 0.05$ , \*\*  $p < 0.01$ , \*\*\*  $p < 0.001$ , \*\*\*\*  $p < 0.0001$ , ns=not significant.

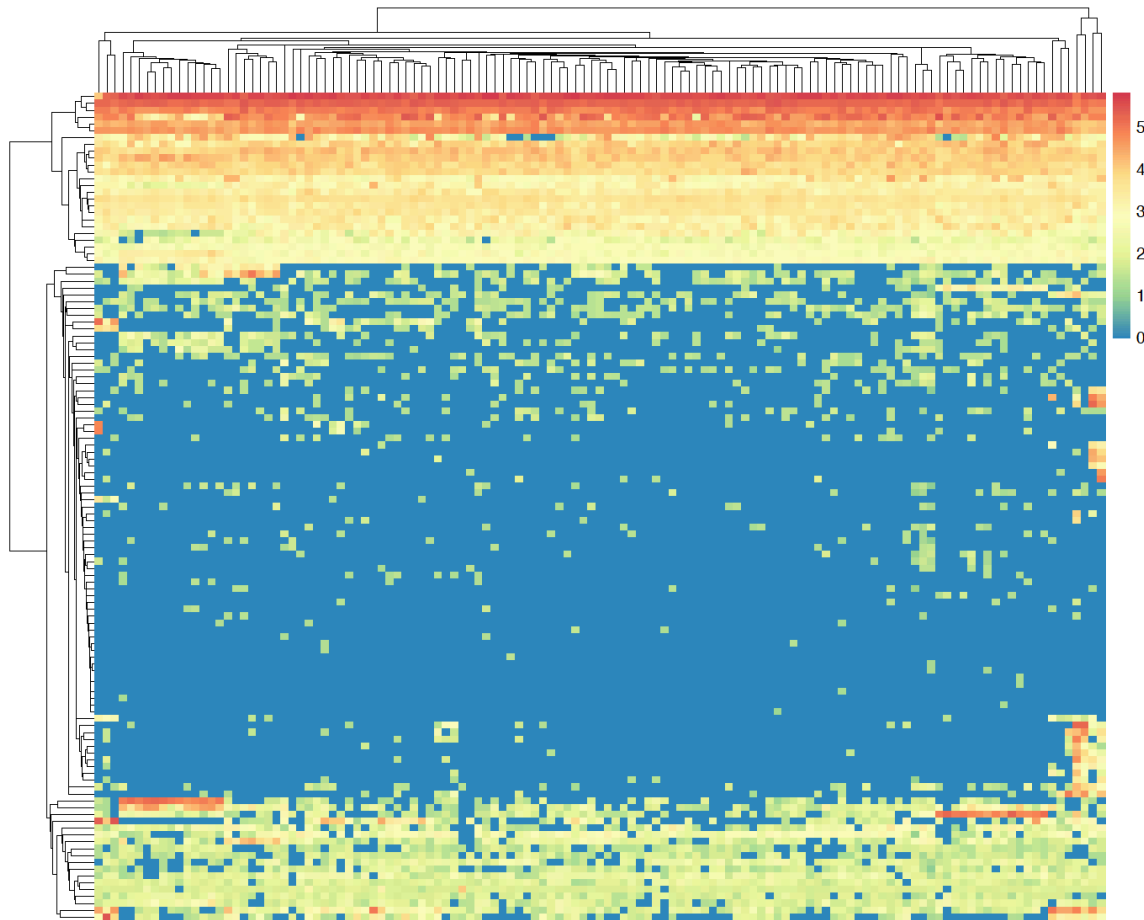

**Fig. S3** Heatmap depicting bidirectional, unsupervised hierarchical cluster analysis of initial mouse fecal microbiomes. Values shown are the normalized reads for all mapped OTUs in the initial fecal mouse microbiomes, prior to antibiotic or diet treatments. Clustering was performed using Euclidian distance with average linkage. Heatmap color scale indicates relative abundance calculated as the  $\log_{10}$  reads per million for better visualization of lower abundance OTUs.

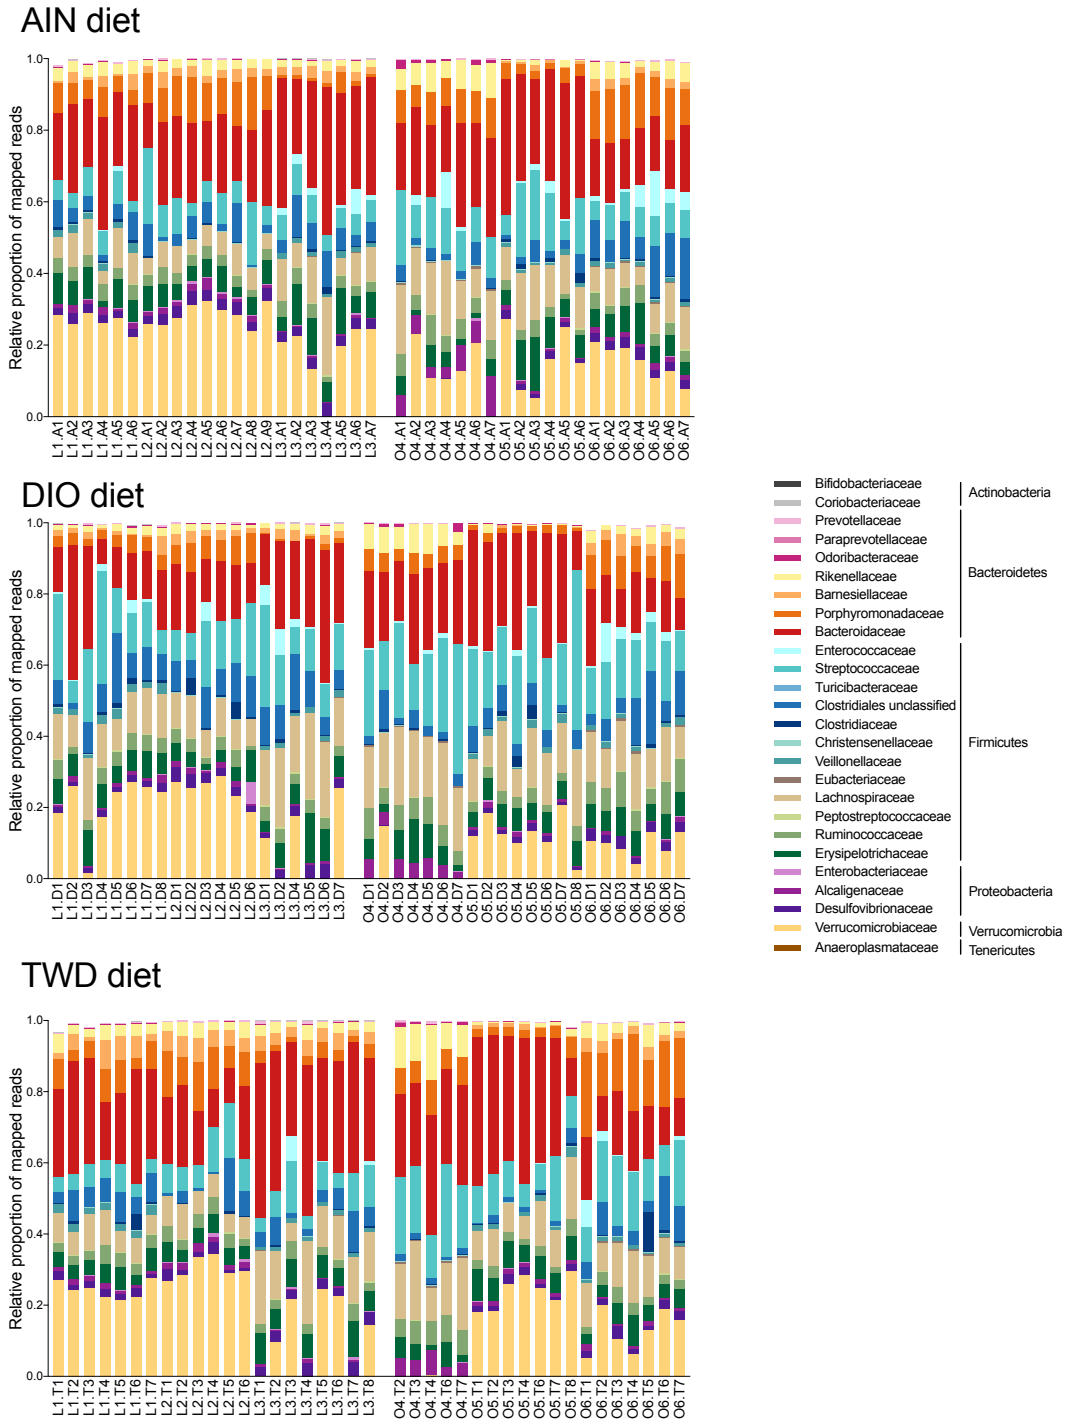

**Fig. S4** Classification of human or mouse fecal bacteria by family for individual mice post fecal microbiome transfer. Data shown are the relative abundance of bacteria to annotated taxa (phylum and family) for individual mice for each experimental diet group. Mouse identification codes that begin with *L* indicate recipients of FMT from lean human donors, and codes that begin with *O* indicate recipients of FMT from obese human donors.



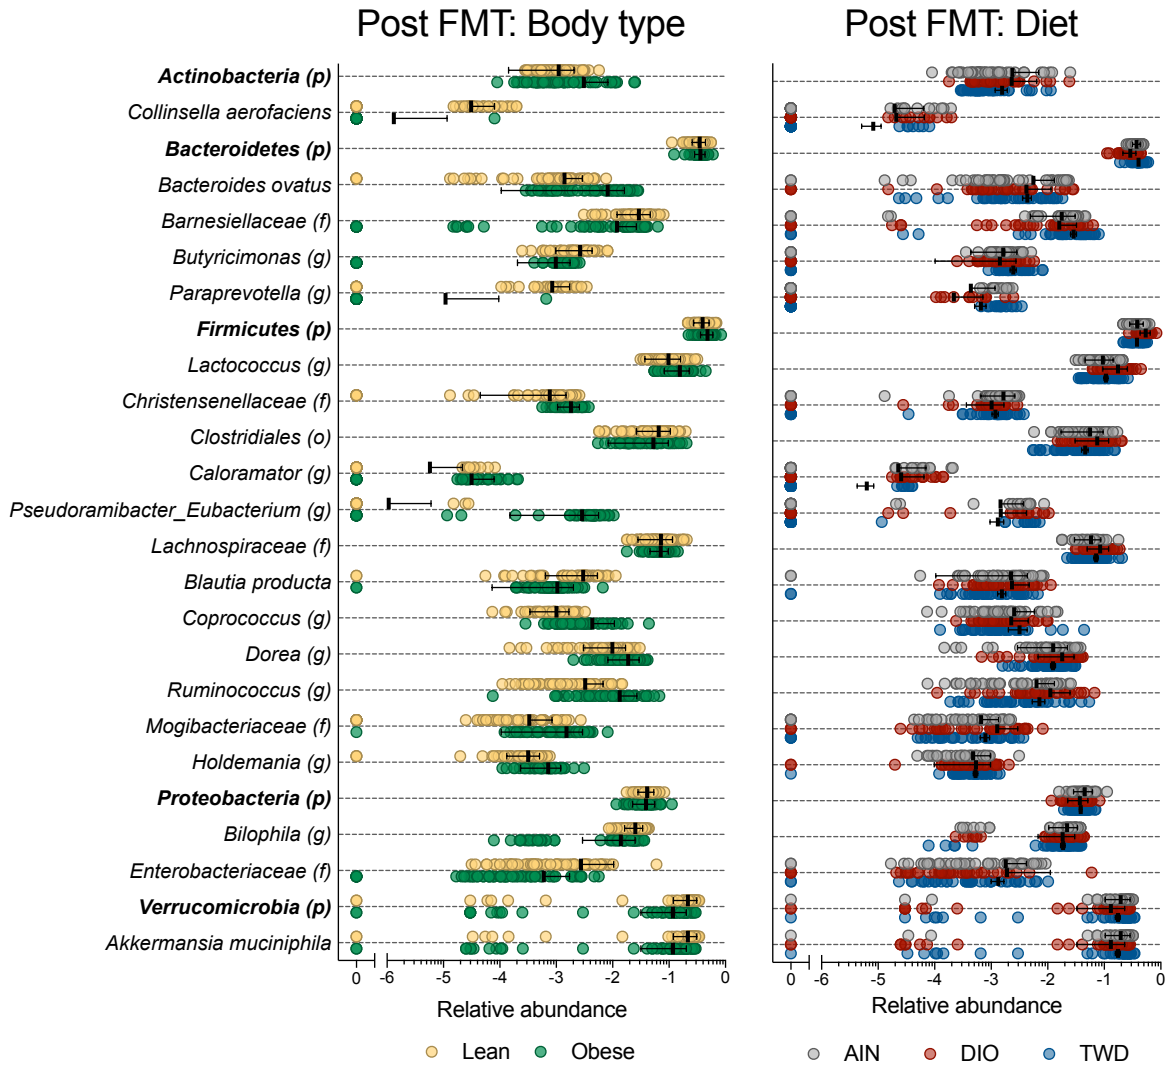

**Fig. S5** Relative abundance of selected bacteria taxa by main factors, body type and experimental diet, post fecal microbiome transfer. Data shown are individual relative abundance values for each mouse, with the black bar and whiskers representing the mean  $\pm$  SEM on a  $\log_{10}$  scale to facilitate visualization of less abundant species. Bold titles indicate the major represented phyla, with members of interest listed below.

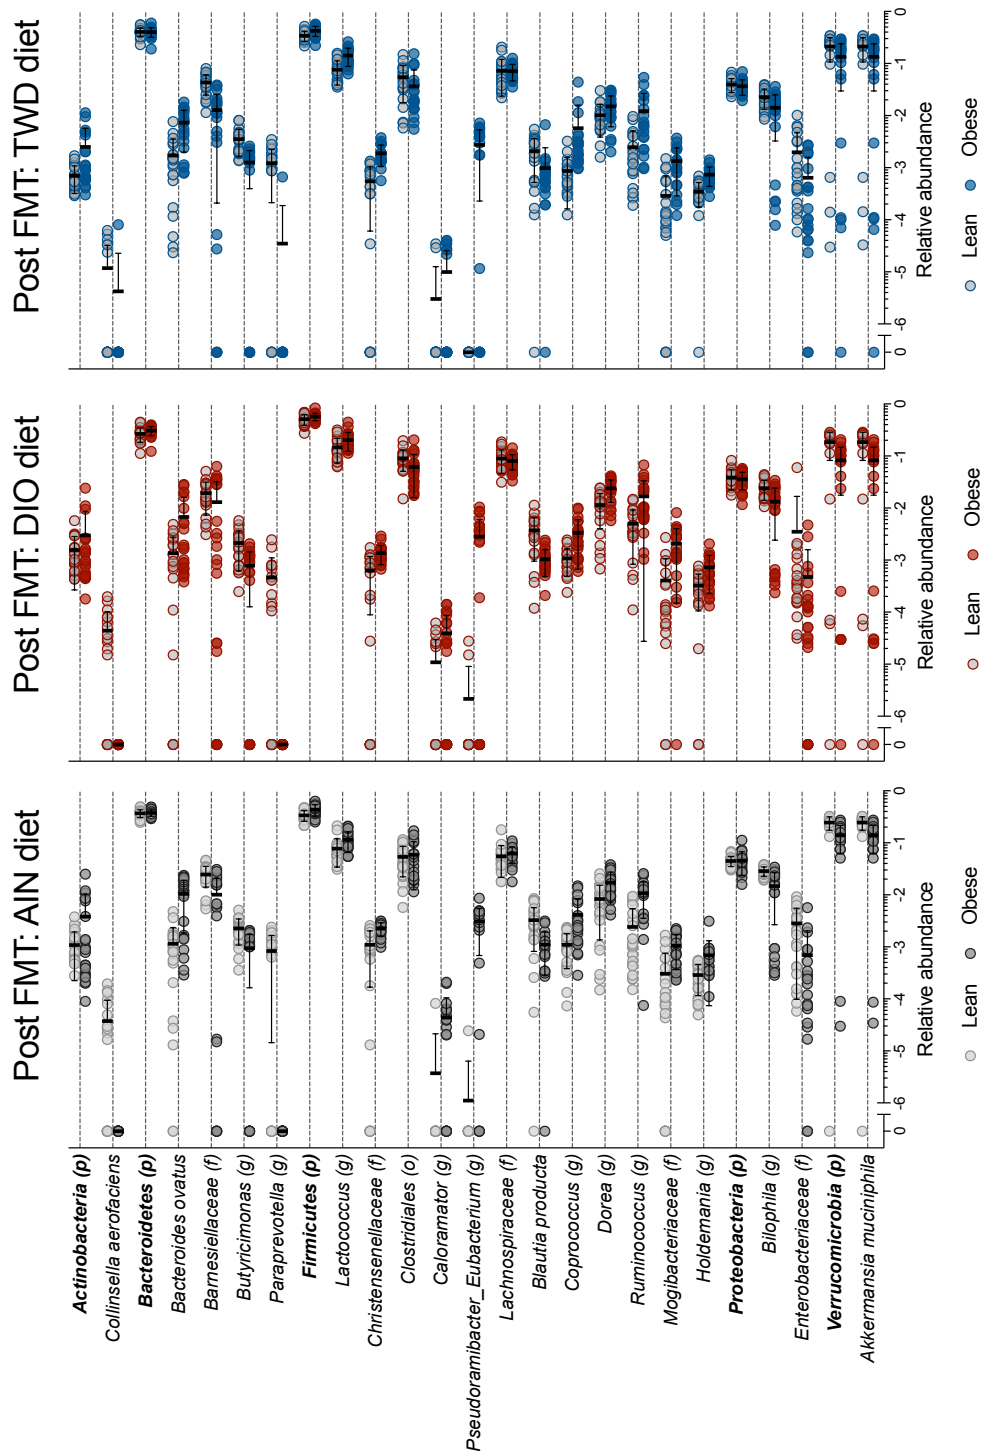

**Fig. S6** Relative abundance of selected bacteria taxa in lean or obese recipient mice stratified by experimental diet post fecal microbiome transfer. Data shown are individual relative abundance values for each mouse, with the black bar and whiskers representing the mean  $\pm$  SEM on a log<sub>10</sub> scale to facilitate visualization of less abundant species. Bold titles indicate the major represented phyla, with members of interest listed below.

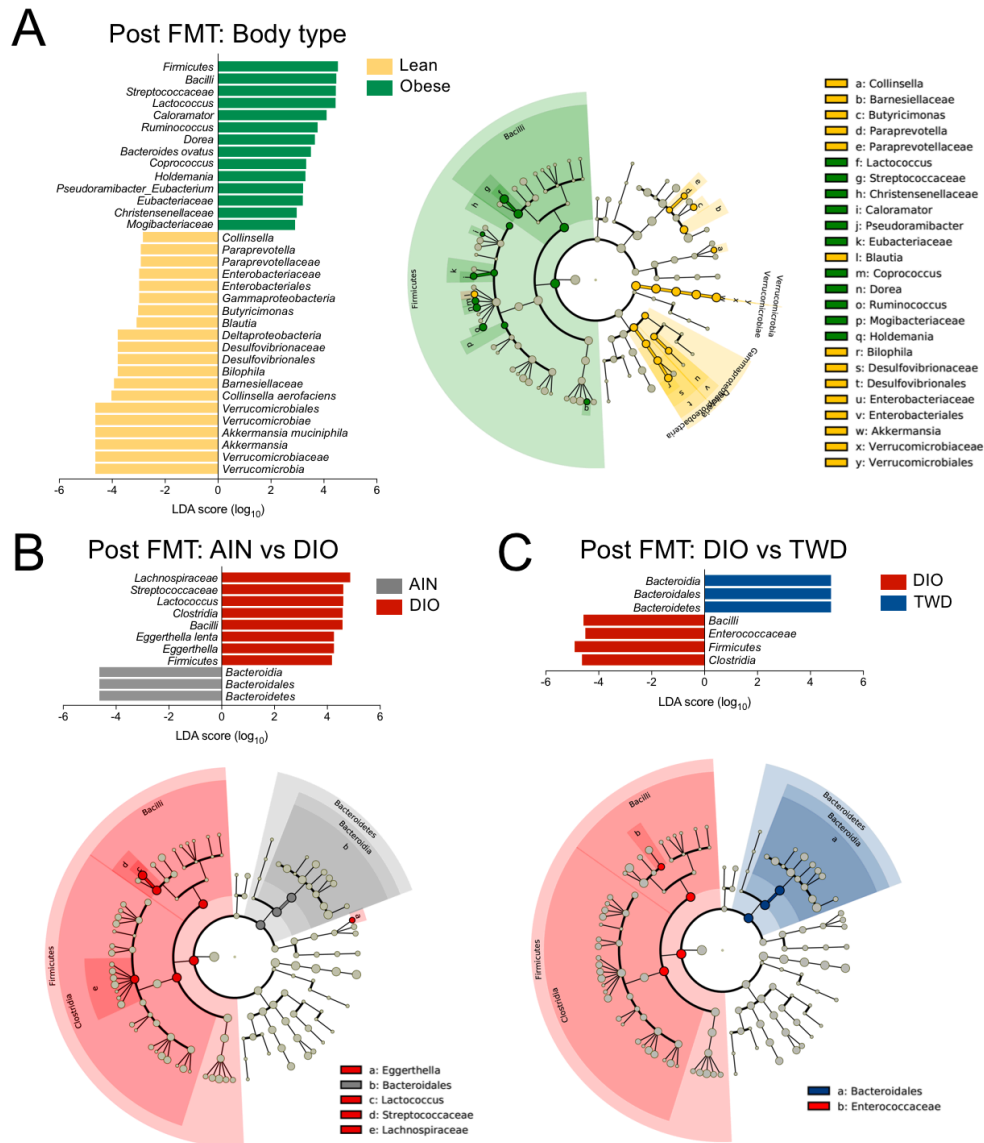

**Fig. S7** Discriminating taxa for recipient mouse microbiomes post fecal transfer. LEfSe analyses were performed using relative abundance data averaged by human donor at the highest classification level taxonomy available. Data shown are the  $\log_{10}$  linear discriminant analysis (LDA) scores following LEfSe analyses and the hierarch of discriminating taxa visualized as cladograms for the following class comparisons: (A) all lean donor recipient mice compared to all obese donor recipient mice, (B) all mice fed AIN diet compared to those fed DIO diet, and (C) all mice fed DIO diet compared to those fed TWD. (No discriminating features were identified for all mice fed AIN compared to those fed TWD.) The structure of these comparisons was designed to mimic tests for main effects of body type and diet (including diet pairwise tests), as was done for other study parameters using the linear mixed model. Relative abundance data of selected taxa of interest are shown in Fig. S4.

### AIN diet

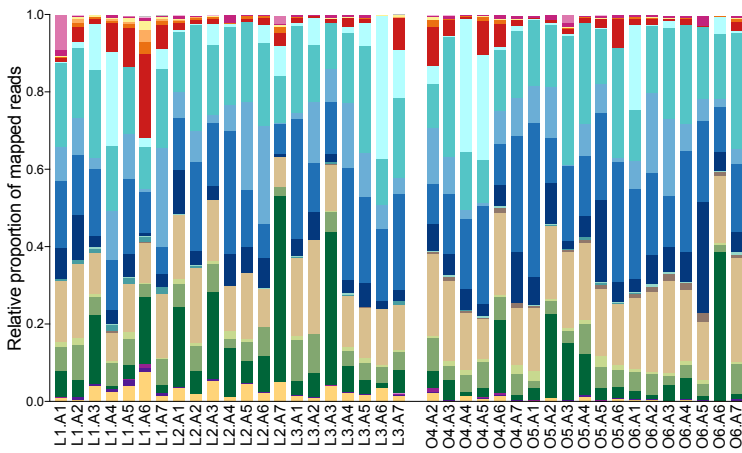

### DIO diet

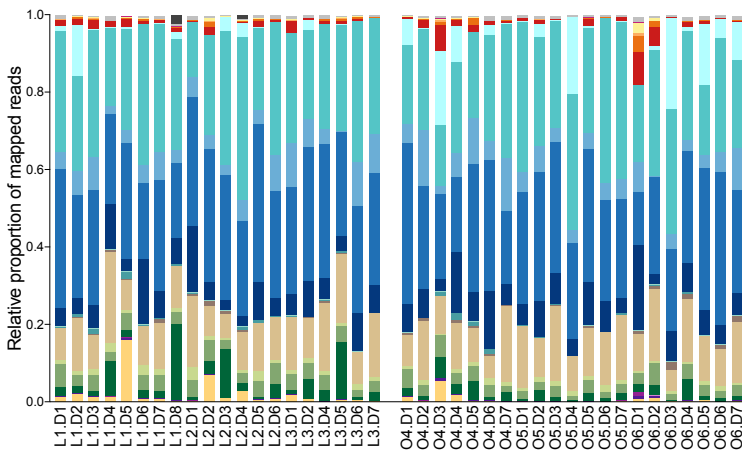

### TWD diet

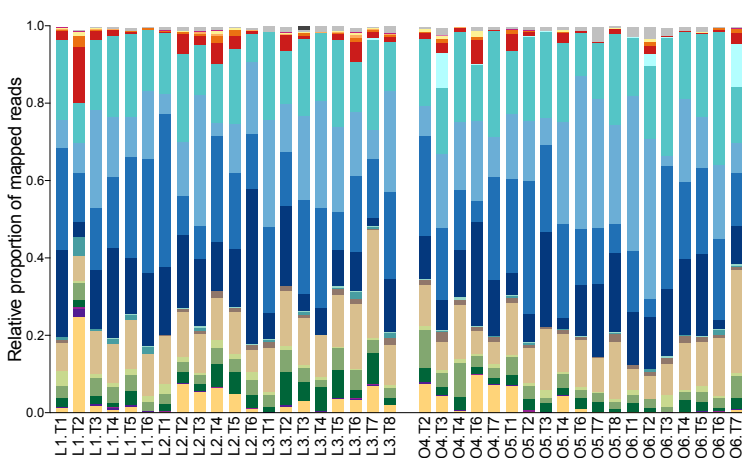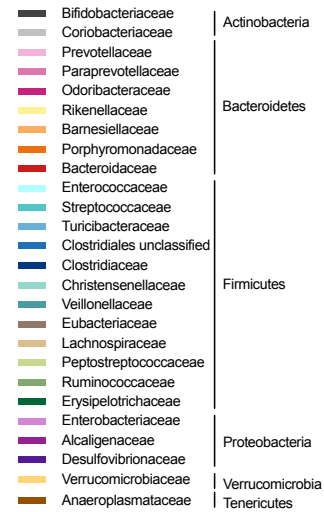

**Fig. S8** Classification of human or mouse fecal bacteria by family for individual mice at necropsy. Data shown are the relative abundance of bacteria to annotated taxa (phylum and family) for individual mice for each experimental diet group. Mouse identification codes that begin with *L* indicate recipients of FMT from lean human donors, and codes that begin with *O* indicate recipients of FMT from obese human donors.

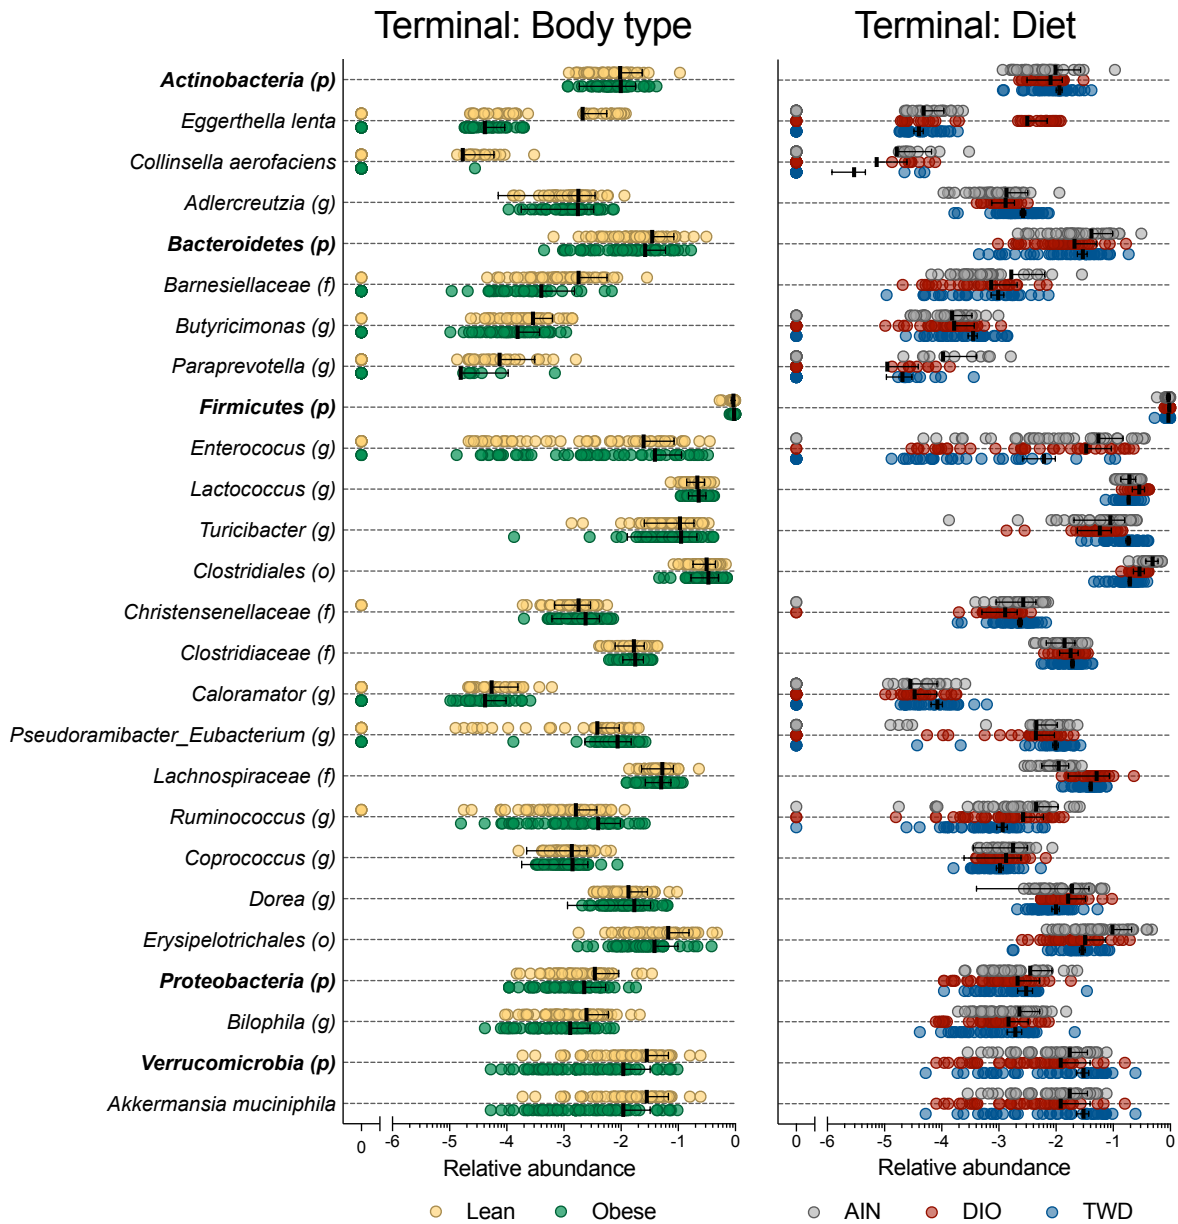

**Fig. S9** Relative abundance of selected bacteria taxa by main factors, body type and experimental diet, at necropsy. Data shown are individual relative abundance values for each mouse, with the black bar and whiskers representing the mean  $\pm$  SEM on a log<sub>10</sub> scale to facilitate visualization of less abundant species. Bold titles indicate the major represented phyla, with members of interest listed below.

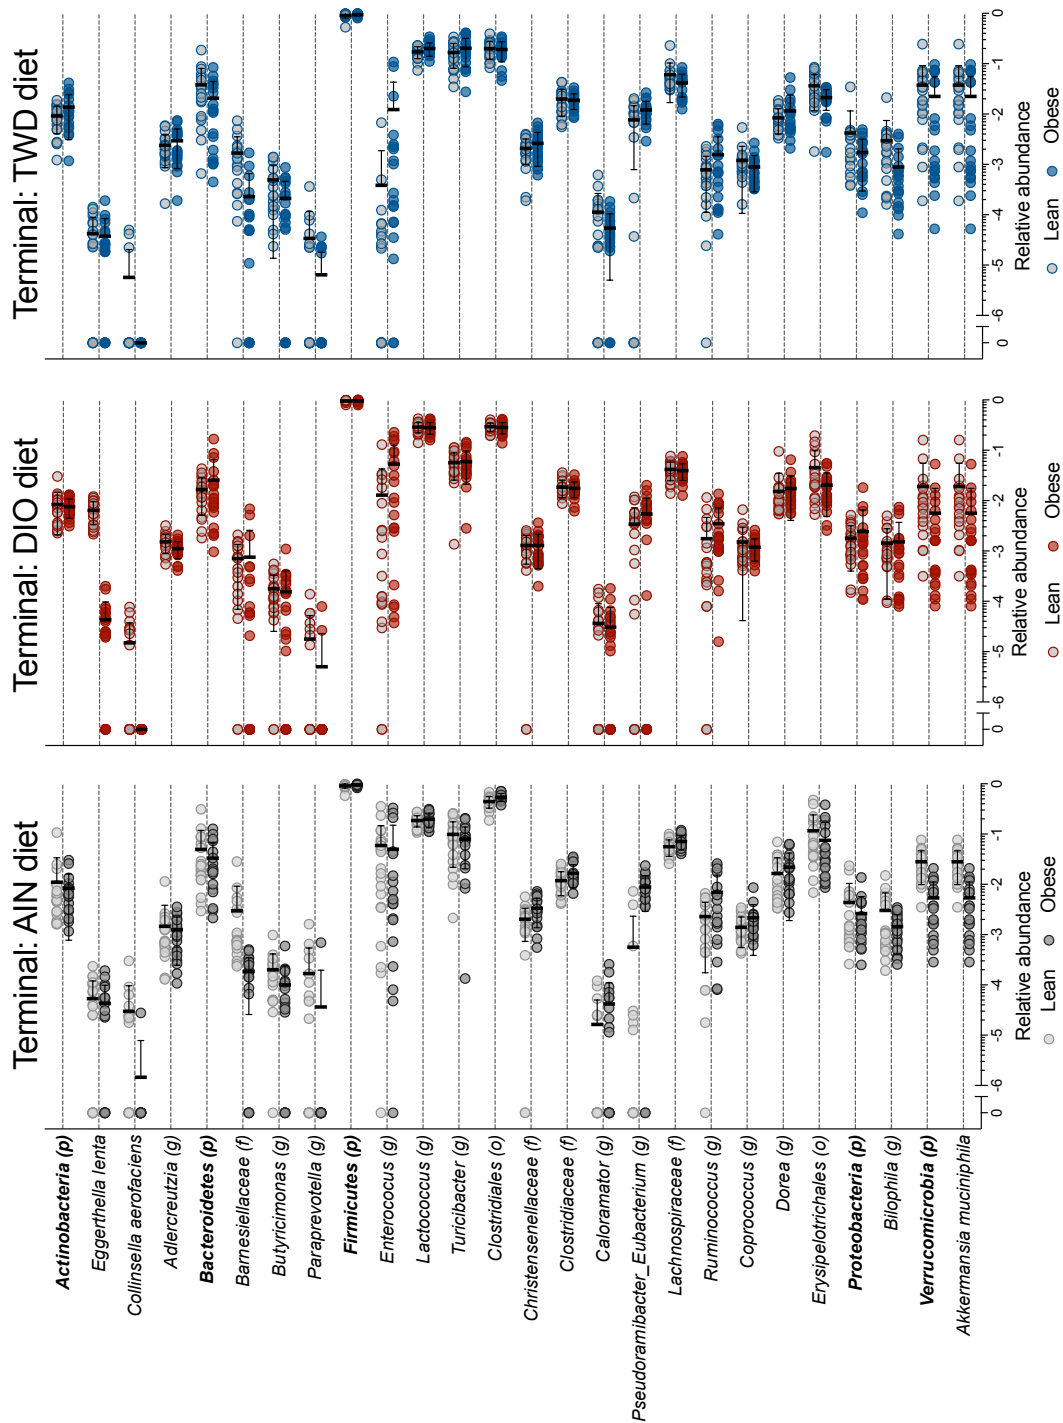

**Fig. S10** Relative abundance of selected bacteria taxa in lean or obese recipient mice stratified by experimental diet at necropsy. Data shown are individual relative abundance values for each mouse, with the black bar and whiskers representing the mean  $\pm$  SEM on a log<sub>10</sub> scale to facilitate visualization of less abundant species. Bold titles indicate the major represented phyla, with members of interest listed below.

### A Terminal: Body type

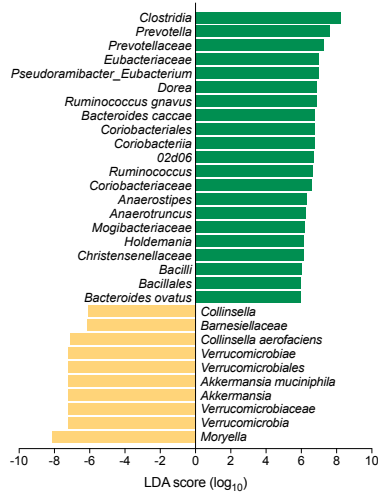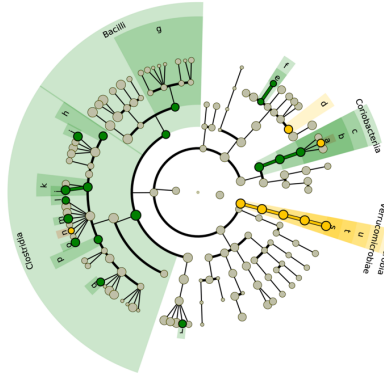

- a: Collinsella
- b: Coriobacteriaceae
- c: Coriobacteriales
- d: Barnesiellaceae
- e: Prevotella
- f: Prevotellaceae
- g: Bacillales
- h: Christensenellaceae
- i: O2d06
- j: Pseudoramibacter
- k: Eubacteriaceae
- l: Anaerostipes
- m: Dorea
- n: Moryella
- o: Ruminococcus
- p: Mogibacteriaceae
- q: Anaerotruncus
- r: Holdemania
- s: Akkermansia
- t: Verrucomicrobiaceae
- u: Verrucomicrobiales

### B Terminal: AIN vs DIO

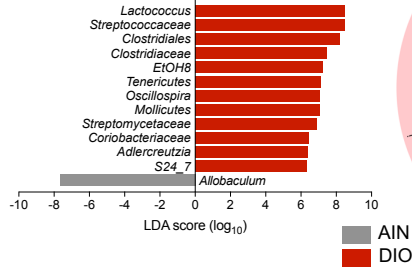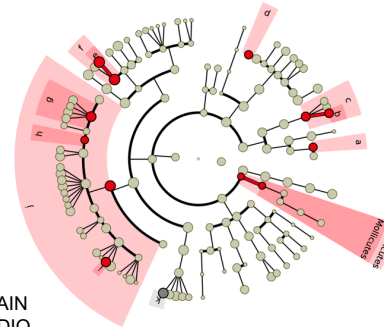

- a: Streptomycetaceae
- b: Adlercreutzia
- c: Coriobacteriaceae
- d: S24\_7
- e: Lactococcus
- f: Streptococcaceae
- g: Clostridiaceae
- h: EtOH8
- i: Oscillospira
- j: Clostridiales
- k: Allobaculum

### C Terminal: AIN vs TWD

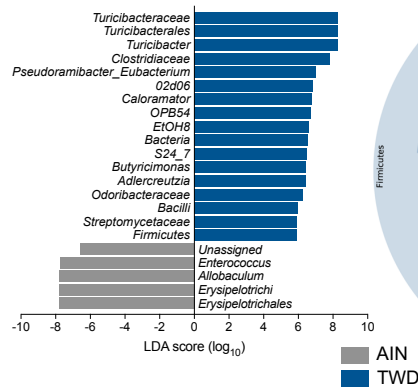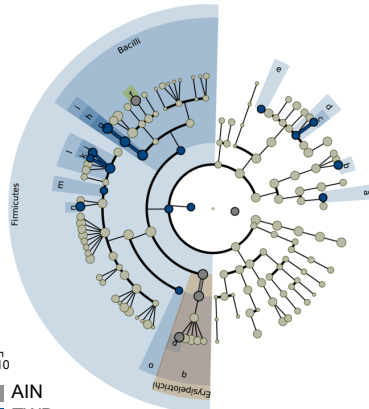

- a: Streptomycetaceae
- b: Adlercreutzia
- c: Butyrivimonas
- d: Odoribacteraceae
- e: S24\_7
- f: Enterococcus
- g: Turicibacter
- h: Turicbacteraceae
- i: Turicibacteriales
- j: O2d06
- k: Caloramator
- l: Clostridiaceae
- m: EtOH8
- n: Pseudoramibacter
- o: OPB54
- p: Allobaculum
- q: Erysipelotrichales

### D Terminal: DIO vs TWD

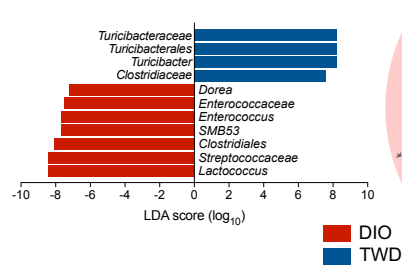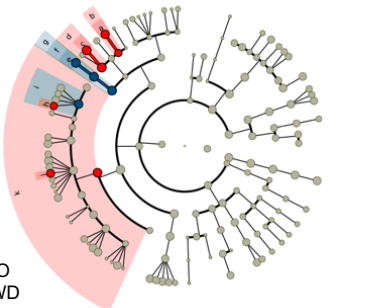

- a: Enterococcus
- b: Enterococcaceae
- c: Lactococcus
- d: Streptococcaceae
- e: Turicibacter
- f: Turicbacteraceae
- g: Turicbacteriales
- h: SMB53
- i: Clostridiaceae
- j: Dorea
- k: Clostridiales

**Fig. S11** Discriminating taxa for recipient mouse microbiomes at necropsy. LEfSe analyses were performed using relative abundance data averaged by human donor at the highest classification level taxonomy available. Data shown are the  $\log_{10}$  linear discriminant analysis (LDA) scores following LEfSe analyses and the hierarch of discriminating taxa visualized as cladograms for the following class comparisons: (A) all lean donor recipient mice compared to all obese donor recipient mice, (B) all mice fed AIN diet compared to those fed DIO diet, and (C) all mice fed DIO diet compared to those fed TWD. (No discriminating features were identified for all mice fed AIN compared to those fed TWD.) The structure of these comparisons was designed to mimic tests for main effects of body type and diet (including diet pairwise tests), as was done for other study parameters using the linear mixed model. Relative abundance data of selected taxa of interest are shown in Fig. S6.



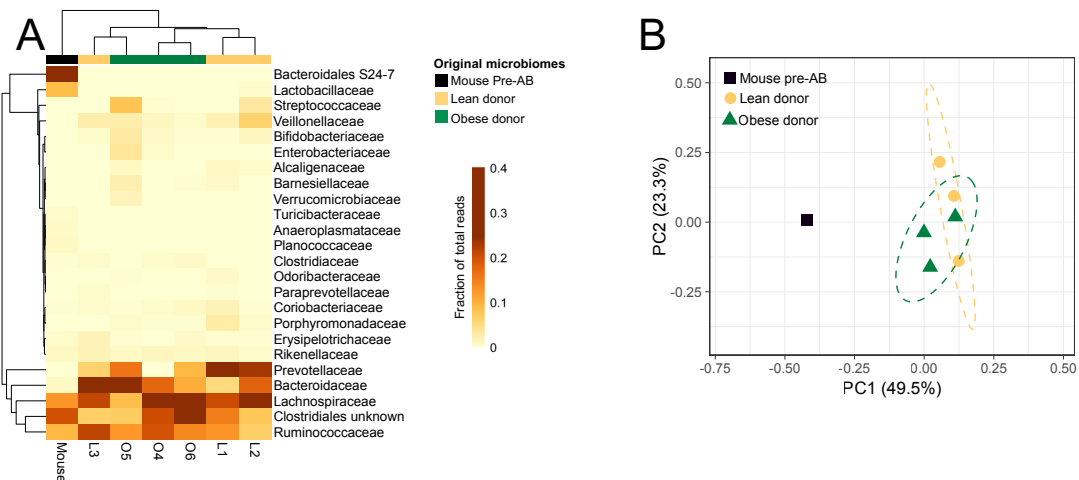

**Fig. S12** Hierarchical clustering and principal components analysis of original mouse and human donor microbiomes. (A) Unsupervised, bidirectional hierarchical cluster analysis of taxonomy relative abundance data for bacteria families comprising a least 1% of the fecal microbiome from all mice prior to antibiotic treatment (pre-AB) and from each of the six human donors (lean: L1, L2, L3; obese, O4, O5, O6). Clustering was performed using Euclidian distance with average linkage. Heatmap color scale indicates relative abundance as fraction of total reads. (B) PCA of family-level taxonomy data plotted according to the first two principal components. Variation attributed to each component is shown. Dashed lines represent the 95% confidence ellipse.

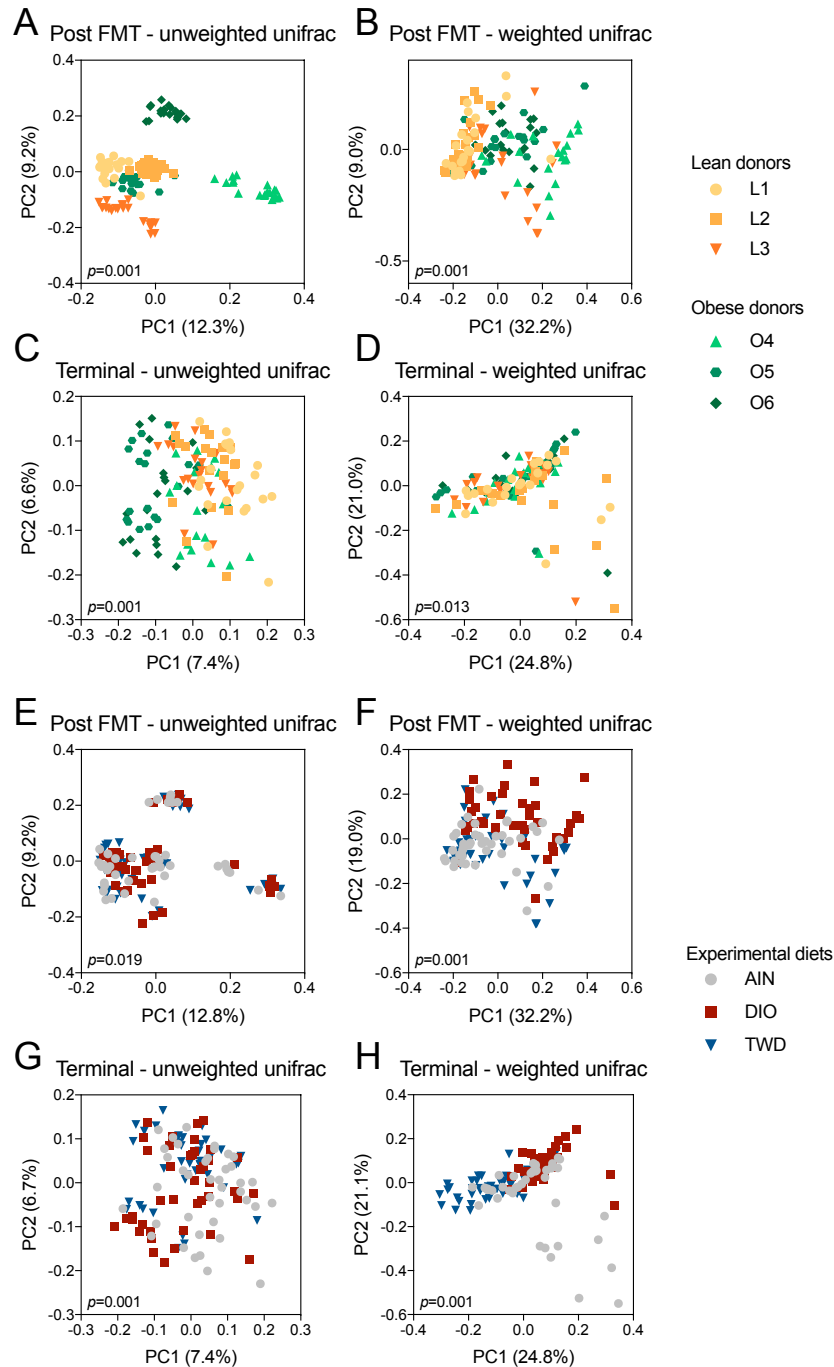

**Fig. S13** Beta diversity principal coordinates plots for weighted and unweighted unifrac distances for post FMT and terminal recipient mouse microbiomes. Data shown are the first two principal components of unweighted or weighted unifrac distances for post FMT and terminal fecal microbiomes categorized by human donor body type (A-D) or experimental diet (E-H). Variation attributed to each coordinate is shown. Permanova  $p$  values are shown for each plot.
